# Supplementary material
Source: PubMed Central journal article supplement (PMC2955982)
Supplement: NIHMS228611-supplement-1_si_001.pdf [file NIHMS228611-supplement-1_si_001.pdf]

## Supporting Information

# Stereocomplexed PLA-PEG Nanoparticles with Dual-Emissive Boron Dyes for Tumor Accumulation

*Farrell R. Kersey,<sup>1</sup> Guoqing Zhang,<sup>1</sup> Gregory M. Palmer,<sup>2</sup> Mark W. Dewhirst,<sup>2</sup> and Cassandra L.*

*Fraser<sup>1,\*</sup>*

<sup>1</sup>Department of Chemistry, University of Virginia, McCormick Road, Charlottesville, Virginia 22904,  
and <sup>2</sup>Department of Radiation Oncology, Duke University Medical Center, Durham, North Carolina

27710

E-mail: [fraser@virginia.edu](mailto:fraser@virginia.edu)

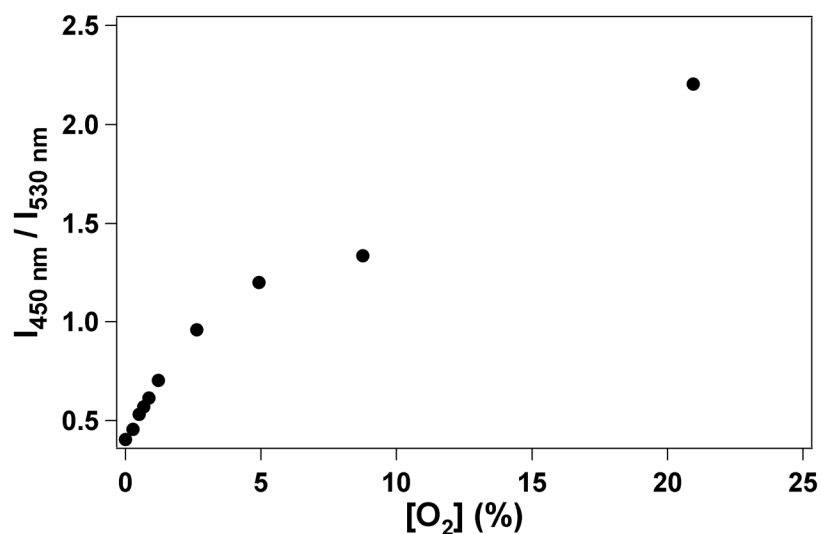

**Figure S1.** Oxygen sensitivity calibration plot for aqueous stereocomplexed boron nanoparticles. The relationship between oxygen concentration and fluorescence/phosphorescence intensity ratio at two fixed wavelengths (450 nm & 530 nm) is shown for oxygen concentrations ranging between 0-21%.

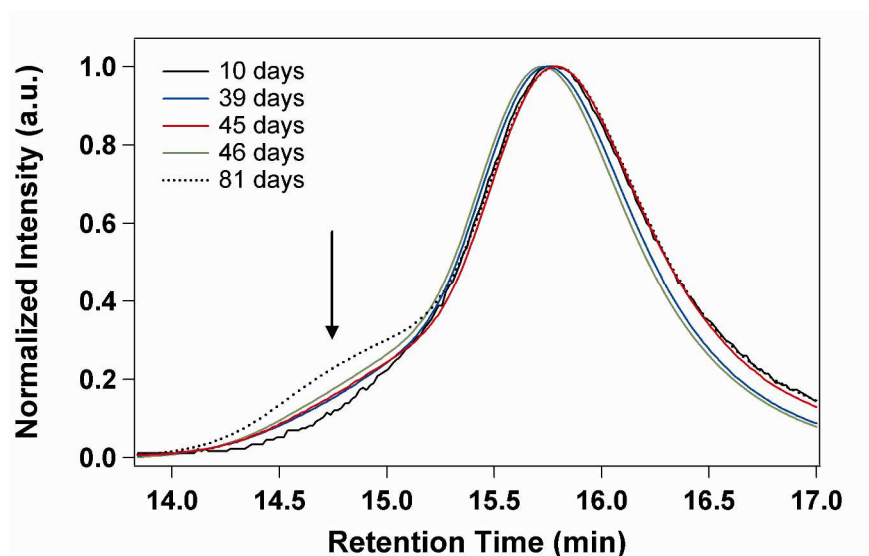

**Figure S2.** UV signal of GPC spectra showing the presence of high-molecular-weight compounds present in BNP samples after several weeks. The arrow denotes the peak shoulder where the aggregated/cross-linked species is observed.

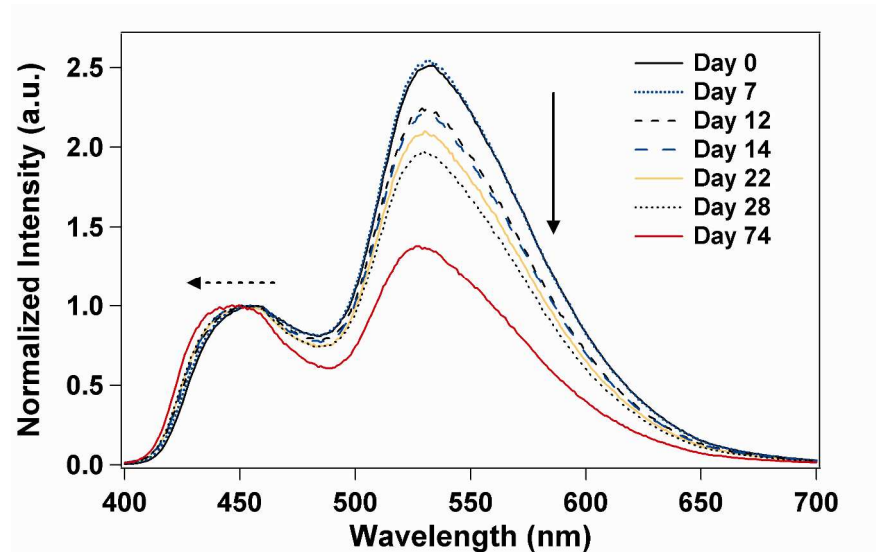

**Figure S3.** Emission spectra of aqueous BNP suspensions showing a decrease in RTP (solid arrow) over several weeks, as well as a blue-shift in fluorescence (dashed arrow). Spectra were obtained after purging BNP solutions with  $N_2$  and normalized against fluorescence  $\lambda_{em}$ .
